# Supplementary material for: The Status of Posidonia oceanica at Tremiti Islands Marine Protected Area (Adriatic Sea)
Source: MDPI journal article supplement (doi:10.3390/biology11060923), 2022-06-16
Supplement: s1 [file s1]

# The Status of *Posidonia oceanica* at Tremiti Islands Marine Protected Area (Adriatic Sea)

Andrea Tursi <sup>1,2,\*</sup>, Francesco Mastrototaro <sup>1,2</sup>, Federica Montesanto <sup>3</sup>, Francesco De Giosa <sup>4</sup>, Anna Lisco <sup>1</sup>, Antonella Bottalico <sup>1</sup> and Giovanni Chimienti <sup>1,2</sup>

<sup>1</sup> Department of Biology, University of Bari Aldo Moro, 70125 Bari, Italy; francesco.mastrototaro@uniba.it (F.M.); annalisco87@gmail.com (A.L.); antonella.bottalico@uniba.it (A.B.); giovanni.chimienti@uniba.it (G.C.)

<sup>2</sup> CoNISMa (Consorzio Nazionale Interuniversitario per le Scienze del Mare), 00196 Rome, Italy

<sup>3</sup> University of Nebraska-Lincoln, 1400 R Street, Lincoln, NE 68588, USA; federica.montesanto@uniba.it

<sup>4</sup> Environmental Surveys S.r.l. (ENSU), Via De Gasperi, 74123 Taranto, Italy; francescodegiosa@ensu.it

\* Correspondence: andrea.tursi@uniba.it

**Table S1.** Density, phenological, and lepidochronological results for each sampling station in 2003, 2015, and 2020.

| Station ID                                           | M1           |              |              | M2           |              |              | M3           |              |              | M4           |              |             | M5           |              |              | M6            |              |              |
|------------------------------------------------------|--------------|--------------|--------------|--------------|--------------|--------------|--------------|--------------|--------------|--------------|--------------|-------------|--------------|--------------|--------------|---------------|--------------|--------------|
| Year                                                 | 2003         | 2015         | 2020         | 2003         | 2015         | 2020         | 2003         | 2015         | 2020         | 2003         | 2015         | 2020        | 2003         | 2015         | 2020         | 2003          | 2015         | 2020         |
| Depth (m)                                            | 19           | 19           | 19           | 17           | 15           | 15           | 10           | 8            | 8            | 23           | 22           | 19          | 15           | 15           | 15           | 11            | 8            | 9            |
| Absolute rhizome density (rhizomes m <sup>-2</sup> ) | 291.3 ± 63.5 | 145.8 ± 28.6 | 197.9 ± 69.1 | 230.0 ± 10.3 | 132.6 ± 19.2 | 135.2 ± 18.1 | 316.3 ± 76.9 | 141.7 ± 21.1 | 169.9 ± 41.4 | 238.8 ± 49.3 | 108.7 ± 16.4 | 89.6 ± 33.9 | 356.3 ± 38.0 | 164.9 ± 15.1 | 104.2 ± 37.6 | 406.3 ± 108.1 | 160.8 ± 31.7 | 193.8 ± 46.0 |
| Relative rhizome density (rhizomes m <sup>-2</sup> ) | 262.1 ± 57.2 | 80.2 ± 15.7  | 105.6 ± 36.9 | 184 ± 8.2    | 101.7 ± 14.7 | 81.1 ± 10.9  | 126.5 ± 30.8 | 42.5 ± 6.3   | 96.3 ± 23.4  | 238.8 ± 49.3 | 45.3 ± 6.8   | 26.9 ± 10.2 | 356.3 ± 38.0 | 110.0 ± 10.0 | 52.1 ± 18.8  | 264.1 ± 70.2  | 92.7 ± 18.3  | 119.5 ± 28.4 |
| Leaf area index (m <sup>2</sup> m <sup>-2</sup> )    | 5.4 ± 1.0    | 1.7 ± 0.3    | 2.4 ± 1.0    | 4.5 ± 0.8    | 2.0 ± 0.5    | 1.5 ± 0.2    | 1.7 ± 0.9    | 0.5 ± 0.2    | 2.1 ± 0.2    | 3.7 ± 0.8    | 0.9 ± 0.1    | 0.4 ± 0.1   | 4.0 ± 1.0    | 2.2 ± 0.6    | 0.8 ± 0.2    | 3.7 ± 1.0     | 1.0 ± 0.2    | 1.9 ± 0.3    |
| Rhizome age                                          | 8.9 ± 2.9    | 10.3 ± 2.0   | 17.3 ± 5.1   | 10.7 ± 4.5   | 15.8 ± 9.9   | 16.8 ± 9.7   | 7.9 ± 4.0    | 10.3 ± 5.0   | 3.5 ± 2.5    | 9.3 ± 8.6    | 7.5 ± 2.4    | 17.7 ± 4.2  | 15.5 ± 5.8   | 8.3 ± 3.2    | 12.3 ± 9.2   | 7.2 ± 3.4     | 8.2 ± 3.5    | 10.2 ± 3.5   |
